# Supplementary material for: The diagnostic utility of microCT for assessing bioerosion in archaeological bone
Source: Research Square preprint supplement (doi:10.21203/rs.3.rs-995605/v1), 2021-10-25
Supplement: Supplementary file 1 [file bdf90819a3d48ab0799c8bf9.xlsx]

## Sheet: ESM 1
Sample ID	Site	Individual, Grave, Find nos.	Skeletal Element	Age Group	Sex	Burial Context
S01	Asparn-Schletz	Individual 24, V 114, Find no. 374	femur	early adult	female	single inhumation
S02	Asparn-Schletz	Grave 18, V 666, Find no. 11676	femur	early mature	female	single inhumation
S04	Asparn-Schletz	Find no. 14300	femur	late mature	female	single inhumation
S05	Asparn-Schletz	Individual 6, settlement ditch with multiple individuals	femur	adult	male	lethal head injuries and carnivore activity
SB01	Asparn-Schletz	Individual 93/19-2, Well V 366, Find no. 4503	mandible	late adult	male	isolated fragment from lower part of a sediment-filled well
SB02	Asparn-Schletz	Individual 93/21-2, Well V 366, Find no. 4280	humerus	juvenile	unknown	isolated fragment from upper part of a sediment-filled well
SB04	Asparn-Schletz	Individual 93/20, Well V 366, Find no. 4529	skull fragment	infans 1a	unknown	isolated fragment from lower part of a sediment-filled well
GE07	Gemeinlebarn A	Grave A 41, Inv. no. 3208	femur	adult	male	single inhumation
GE08	Gemeinlebarn A	Grave A 32, Inv. no. 3203	femur	mature	male	single inhumation
GE09	Gemeinlebarn A	Grave A 147, Inv. no. 6132	femur	adult	female	single inhumation
GE10	Gemeinlebarn A	Grave A 215/6, Inv. no. 6162	femur	adult	female	inhumation on the bottom of a grave with scattered remains of at least 4 individuals above
GE11	Gemeinlebarn A	Grave A 21, Inv. no. 3193	femur	adult-mature	female	multiple grave or redeposition
GE15	Gemeinlebarn A	Grave A 21, Inv. no. 3194	femur	mature	male	multiple grave or redeposition
IN01	Inzersdorf ob der Traisen	Grave 32, Find no. 1, 256/1981	femur	adult-mature	female	cremated & buried
IN02	Inzersdorf ob der Traisen	Grave 10, Find no. 6, 256/1981	femur	adult-mature	male	cremated & buried
IN03	Inzersdorf ob der Traisen	Grave 210, Find no. 9, 256/1981	femur	mature	male	cremated & buried
IN04	Inzersdorf ob der Traisen	Grave 106/1, Find no. 22, 256/1981	femur	senile?	female	cremated & buried
GÖ01	Göttlesbrunn-Arbesthal	Grave 5, Obj. no. 38, Find no. 113	femur	early adult	female	single inhumation
GÖ24	Göttlesbrunn-Arbesthal	Grave 5, Obj. no. 38, Find no. 113	rib	early adult	female	single inhumation
GÖ02	Göttlesbrunn-Arbesthal	Grave 6, Obj. no. 36, Find no. 93	femur	mature	female	single inhumation
GÖ03	Göttlesbrunn-Arbesthal	Grave 10, Obj. no. 29, Find no. 99	femur	late mature to senile	male	single inhumation
GÖ04	Göttlesbrunn-Arbesthal	Grave 2, Obj. no. 30, Find no. 86	femur	late juvenile	female	single inhumation
GÖ25	Göttlesbrunn-Arbesthal	Grave 2, Obj. no. 30, Find no. 86	rib	late juvenile	female	single inhumation
GÖ14	Göttlesbrunn-Arbesthal	Grave 14, Obj. no. 89, Find no. 493	ovicaprid humerus	unknown	unknown	food offering
R01	Roseldorf	Find no. 30/14-09 [77]	long bone	adult	unknown	cremated & deposited (commingled)
R02	Roseldorf	Find no. R8-14-2-30-1899, large sacrificial pit (District 1)	skull fragment	adult	unknown	deposited (commingled)
R03	Roseldorf	Find no. R7-14-3-3-728, large sacrificial pit, Object 14 (District 1)	femur	adult	unknown	deposited (commingled)
R04	Roseldorf	Find no. R6-12-3-2-370, small sanctuary, Object 12 (District 1)	faunal long bone fragment	unknown	unknown	deposited (commingled)
