# Supplementary material for: The diagnostic utility of microCT for assessing bioerosion in archaeological bone
Source: Research Square preprint supplement (doi:10.21203/rs.3.rs-995605/v1), 2021-10-25
Supplement: Supplementary file 2 [file bf185c8351066d2a1fee6c58.xlsx]

## Sheet: ESM 2 (2)
Skeletal Element	Sample ID	OHI 1	OHI 2	VHI 1	VHI 2	OHI Average	VHI Average
Femur	GÖ04	5	5	5	5	5	5
Rib	GÖ25	5	3	5	5	4	5
Rib	GÖ24	5	4	4.5	4.5	4.5	4.5
Femur	GÖ01	5	4	4.5	4.5	4.5	4.5
Femur	GE15	4	4	5	4	4	4.5
Femur	GE11	1	1	1	1.5	1	1.25
Femur	GE07	1	1	0	0.5	1	0.25
Femur	GE08	1	0	1.5	0	0.5	0.75
Femur	GE09	1	1	1	2	1	1.5
Femur	R03	1	1	2	1.5	1	1.75
Femur	GE10	1	0	0.5	1	0.5	0.75
Femur	S02	0	1	1	1	0.5	1
Femur	S05	0	0	0	0	0	0
Mandible	SB01	5	5	5	5	5	5
Femur	S01	3	2.5	3	3	2.75	3
Faunal long bone fragment	R04	4	3	3	3	3.5	3
Cremated long bone	R01	5	5	5	4	5	4.5
Skull fragment	R02	2	2	2	2	2	2
Skull fragment	SB04	5	5	5	5	5	5
Femur	GÖ02	0	1	0.5	0.5	0.5	0.5
Femur	GÖ03	0	0	0	0	0	0
Humerus	SB02	3	2	2	3	2.5	2.5
Cremated Femur	IN02	4	5	4	4	4.5	4
Cremated Femur	IN01	5	4.5	4.5	4.5	4.75	4.5
Cremated Femur	IN03	5	5	4.5	4.5	5	4.5
Ovicaprid humerus	GÖ14	4	3	4	4.5	3.5	4.25
Cremated Femur	IN04	5	5	4	4	5	4
Femur	S04	0	0	0	0.5	0	0.25
