# Supplementary material for: The diagnostic utility of microCT for assessing bioerosion in archaeological bone
Source: Research Square preprint supplement (doi:10.21203/rs.3.rs-995605/v1), 2021-10-25
Supplement: Supplementary file 3 [file ce4e98b666815923ee9b6ec0.xlsx]

## Sheet: ESM 3
Sample ID	Microscopy	Scanner	Voltage (kV)	Current (μA)	Exposure (ms)	Filtration	Voxel size (μm)	Operator	Embedding
GÖ04	LM	Zeiss/Xradia MicroXCT-200	80	8W	20 seconds [no binning]	n/a	6.7	BM	✓
GÖ25	SEM	Zeiss/Xradia MicroXCT-200	80	8W	20 seconds [no binning]	LE#1 Filter	8.6	BM	✗
GÖ01	LM	Zeiss/Xradia MicroXCT-200	80	8W	15 seconds [no binning]	LE#2 Filter	8	BM	✓
GÖ24	SEM	Zeiss/Xradia MicroXCT-200	80	8W	20 seconds [no binning]	LE#1 Filter	10	BM	✗
SB01	LM	Zeiss/Xradia MicroXCT-200	80	8W	20 seconds [no binning]	LE#2 Filter	8	BM	✓
SB04	LM	Zeiss/Xradia MicroXCT-200	80	8W	30 seconds [no binning]	LE#2 Filter	8	BM	✓
GE15	LM	Zeiss/Xradia MicroXCT-200	80	8W	30 seconds [no binning]	LE#2 Filter	8	BM	✓
R01	LM	Zeiss/Xradia MicroXCT-200	80	8W	20 seconds [no binning]	LE#1 Filter	8.5	BM	✓
SB02	LM	Zeiss/Xradia MicroXCT-200	80	8W	20 seconds [no binning]	LE#2 Filter	8	BM	✓
R04	LM	Zeiss/Xradia MicroXCT-200	80	8W	20 seconds [no binning]	LE#2 Filter	8	BM	✓
S01 Area E	LM	Zeiss/Xradia MicroXCT-200	80	8W	30 seconds [no binning]	LE#2 Filter	8	BM	✓
GE11	LM	Zeiss/Xradia MicroXCT-200	80	8W	20 seconds [no binning]	LE#2 Filter	8	BM	✓
R02	LM	Zeiss/Xradia MicroXCT-200	80	8W	20 seconds [no binning]	LE#2 Filter	8	BM	✓
GE07	LM	Zeiss/Xradia MicroXCT-200	80	8W	30 seconds [no binning]	LE#2 Filter	8	BM	✓
GE08	LM	Zeiss/Xradia MicroXCT-200	80	8W	30 seconds [no binning]	LE#2 Filter	8	BM	✓
GE09 Area C	LM	Zeiss/Xradia MicroXCT-200	80	8W	30 seconds [no binning]	LE#2 Filter	8	BM	✓
R03 Area C	LM	Zeiss/Xradia MicroXCT-200	80	8W	20 seconds [no binning]	LE#2 Filter	8	BM	✓
GE10	LM	Zeiss/Xradia MicroXCT-200	80	8W	30 seconds [no binning]	LE#2 Filter	8	BM	✓
S02	LM	Zeiss/Xradia MicroXCT-200	80	8W	30 seconds [no binning]	LE#2 Filter	8	BM	✓
S04	LM	Zeiss/Xradia MicroXCT-200	80	8W	40 seconds [no binning]	LE#2 Filter	4	BM	✓
S05	LM	Zeiss/Xradia MicroXCT-200	80	8W	20 seconds [no binning]	LE#2 Filter	8	BM	✓
GÖ02	SEM	Zeiss/Xradia MicroXCT-200	80	8W	20 seconds [no binning]	n/a	8	BM	✓
GÖ03	SEM	Zeiss/Xradia MicroXCT-200	80	8W	20 seconds [no binning]	n/a	8	BM	✓
IN01	LM	Zeiss/Xradia MicroXCT-200	80	8W	30 seconds [no binning]	LE#1 Filter	10.9	BM	✓
IN03	LM	Zeiss/Xradia MicroXCT-200	80	8W	30 seconds [no binning]	LE#1 Filter	9	BM	✓
GÖ14	SEM	Bruker/Skyscan 1272	100	100	4501	Cu 0.11mm	6.5	BM+KM	✗
IN02	SEM	Bruker/Skyscan 1272	100	100	1815	Cu 0.11mm	5	BM	✗
IN04	LM	Bruker/Skyscan 1272	100	100	1815	Cu 0.11mm	5	BM	✓
